# Supplementary material for: Sulfated Glycosaminoglycans as Viral Decoy Receptors for Human Adenovirus Type 37
Source: MDPI journal article supplement (doi:10.3390/v11030247), 2019-03-12
Supplement: s1 [file s1]

**Table S1. Probes investigated in a focused GAG microarray**

| Chart Position | Probe <sup>a</sup>   | Sequence <sup>b</sup>                                                                                                                                                           |
|----------------|----------------------|---------------------------------------------------------------------------------------------------------------------------------------------------------------------------------|
| 1              | HA 12-mer            | 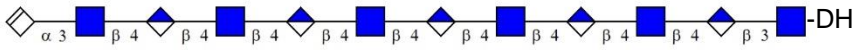 -DH                                                                                          |
| 2              | CS-A 6-mer           |  -AO <sup>c</sup>                                                                              |
| 3              | CS-A 14-mer          |  -AO <sup>c</sup>                                                                             |
| 4              | CS-B 6-mer           |  -AO                                                                                           |
| 5              | CS-B 14-mer          |  -AO                                                                                          |
| 6              | CS-C 6-mer           |  -AO <sup>c</sup>                                                                              |
| 7              | CS-C 14-mer          |  -AO <sup>c</sup>                                                                             |
| 8              | Hep 10-mer           |  -AO                                                                                          |
| 9              | Hep 14-mer           |  -AO                                                                                         |
| 10             | HS S6-mer            |  -AO<br>May contain small amounts of GlcNS(6S) and IdoA(2S); some GlcNAc may be non-sulfated |
| 11             | HS S8-mer            |  -AO<br>May contain small amounts of GlcNS(6S) and IdoA(2S); some GlcNAc may be non-sulfated |
| 12             | KS 6-mer (K'ase I)   |  -AO<br>Variously 6S on Gal and GlcNAc                                                       |
| 13             | KS 14-mer (K'ase I)  |  -AO<br>Variously 6S on Gal and GlcNAc                                                      |
| 14             | KS 6-mer (K'ase II)  |  -AO<br>Variously 6S on Gal and GlcNAc                                                       |
| 15             | KS 14-mer (K'ase II) |  -AO<br>Variously 6S on Gal and GlcNAc                                                      |

 Iduronic acid (IdoA)

 Glucosamine (GlcNH<sub>2</sub>)

 Galactose (Gal)

 4,5-unsaturated hexuronic acid (dUA)

 Glucuronic acid (GlcA)

 N-acetyl Glucosamine (GlcNAc)

 N-acetyl Galactosamine (GalNAc)

 2,5-anhydro-Mannose (ManA)

<sup>a</sup> Probes are neoglycolipids (NGLs). Arabic numbers in the probe names are used to designate the size of the major component in each fraction. K'ase I and II denote keratanase I and II digestion products (further details are in Table S2).

<sup>b</sup> Probes 1-9: only the main components (or 'idealised sequences' in the case of CS-related probes) are shown as representative. Other components with different sulfation contents or patterns exist as the GAG chains are complex and heterogeneous. Probes 10-15: mixtures of oligosaccharide with various sulfation contents/positions as indicated. DH and AO, lipid moieties of NGLs prepared by reductive amination and oxime ligation, respectively (further details are in Table S2).

<sup>c</sup> Only 'idealised sequences' are shown. CS-A and CS-C both contain GalNAc(4S) and GalNAc(6S) but with different ratios. For CS-A the ratio of 4S:6S≈3:2, whereas for CS-C 4S:6S≈1:4, in the respective polysaccharides ([Chai W. et al. J Biol Chem. 227:22438-22446, 2002](#)).
